# Supplementary material for: Evaluation of Medical Information on Male Sexual Dysfunction on Baidu Encyclopedia and Wikipedia: Comparative Study
Source: PubMed Central journal article supplement (PMC9399830; doi:10.2196/37339), 2022-08-09
Supplement: jmir_v24i8e37339_app1.pdf [file jmir_v24i8e37339_app1.pdf]

| <b>Basic information</b>                                                                                                               |                                                                                                                                                                                                                                            |
|----------------------------------------------------------------------------------------------------------------------------------------|--------------------------------------------------------------------------------------------------------------------------------------------------------------------------------------------------------------------------------------------|
| Reviewer                                                                                                                               | Name: _____                                                                                                                                                                                                                                |
| Searching Themes                                                                                                                       | Keywords: _____                                                                                                                                                                                                                            |
| Search engine                                                                                                                          | <input type="checkbox"/> Wikipedia <input type="checkbox"/> Baidu Encyclopedia                                                                                                                                                             |
| Access date                                                                                                                            | Access date: _____                                                                                                                                                                                                                         |
| Available entries                                                                                                                      | 1. http://<br>2. ....<br>3. ....<br>4. ....<br>.....                                                                                                                                                                                       |
| Selected entry                                                                                                                         |                                                                                                                                                                                                                                            |
| Real-time Update                                                                                                                       | <input type="checkbox"/> Yes <input type="checkbox"/> No                                                                                                                                                                                   |
| Author type                                                                                                                            | <input type="checkbox"/> Organization <input type="checkbox"/> Individuals                                                                                                                                                                 |
| Page views                                                                                                                             |                                                                                                                                                                                                                                            |
| Reference number                                                                                                                       |                                                                                                                                                                                                                                            |
| External links                                                                                                                         | <input type="checkbox"/> Yes <input type="checkbox"/> No                                                                                                                                                                                   |
| Advertisement                                                                                                                          | <input type="checkbox"/> Yes <input type="checkbox"/> No                                                                                                                                                                                   |
| <b>Assessment of the Quality of the Research Articles</b>                                                                              |                                                                                                                                                                                                                                            |
| <b>JAMA</b>                                                                                                                            | <input type="checkbox"/> Authorship<br>Authors and contributors, their affiliations, and relevant credentials should be provided                                                                                                           |
|                                                                                                                                        | <input type="checkbox"/> Attribution<br>References and sources for all content should be listed clearly, and all relevant copyright information should be noted                                                                            |
|                                                                                                                                        | <input type="checkbox"/> Disclosure<br>Website “ownership” should be prominently and fully disclosed, as should any sponsorship, advertising, underwriting, commercial funding arrangements or support, or potential conflicts of interest |
|                                                                                                                                        | <input type="checkbox"/> Currency<br>Dates when content was posted and updated should be indicated                                                                                                                                         |
| <b>JAMA scores: _____</b>                                                                                                              |                                                                                                                                                                                                                                            |
| <b>GQS</b>                                                                                                                             | 1. Poor quality, very unlikely to be of any use to patients                                                                                                                                                                                |
|                                                                                                                                        | 2. Poor quality but some information present, of very limited use to patients                                                                                                                                                              |
|                                                                                                                                        | 3. Suboptimal flow, some information covered but important topics missing, somewhat useful to patients                                                                                                                                     |
|                                                                                                                                        | 4. Good quality and flow, most important topics covered, useful to patients                                                                                                                                                                |
|                                                                                                                                        | 5. Excellent quality and flow, highly useful to patients                                                                                                                                                                                   |
| <b>GQS scores: _____</b>                                                                                                               |                                                                                                                                                                                                                                            |
| <b>DISCERN scores</b>                                                                                                                  | <b>Section 1 Is the publication reliable?</b>                                                                                                                                                                                              |
| <input type="checkbox"/> 1 <input type="checkbox"/> 2 <input type="checkbox"/> 3 <input type="checkbox"/> 4 <input type="checkbox"/> 5 | 1. Are the aims clear?                                                                                                                                                                                                                     |
| <input type="checkbox"/> 1 <input type="checkbox"/> 2 <input type="checkbox"/> 3 <input type="checkbox"/> 4 <input type="checkbox"/> 5 | 2. Does it achieve its aims?                                                                                                                                                                                                               |
| <input type="checkbox"/> 1 <input type="checkbox"/> 2 <input type="checkbox"/> 3 <input type="checkbox"/> 4 <input type="checkbox"/> 5 | 3. Is it relevant?                                                                                                                                                                                                                         |
| <input type="checkbox"/> 1 <input type="checkbox"/> 2 <input type="checkbox"/> 3 <input type="checkbox"/> 4 <input type="checkbox"/> 5 | 4. Is it clear what sources of information were used to compile the publication (other than the author or producer)?                                                                                                                       |
| <input type="checkbox"/> 1 <input type="checkbox"/> 2 <input type="checkbox"/> 3 <input type="checkbox"/> 4 <input type="checkbox"/> 5 | 5. Is it clear when the information used or reported in the publication was produced?                                                                                                                                                      |
| <input type="checkbox"/> 1 <input type="checkbox"/> 2 <input type="checkbox"/> 3 <input type="checkbox"/> 4 <input type="checkbox"/> 5 | 6. Is it balanced and unbiased?                                                                                                                                                                                                            |
| <input type="checkbox"/> 1 <input type="checkbox"/> 2 <input type="checkbox"/> 3 <input type="checkbox"/> 4 <input type="checkbox"/> 5 | 7. Does it provide details of additional sources of support and information?                                                                                                                                                               |
| <input type="checkbox"/> 1 <input type="checkbox"/> 2 <input type="checkbox"/> 3 <input type="checkbox"/> 4 <input type="checkbox"/> 5 | 8. Does it refer to areas of uncertainty?                                                                                                                                                                                                  |
| <b>Section 1 scores: _____</b>                                                                                                         |                                                                                                                                                                                                                                            |

|                                                                                                                                        |                                                                                                                                                         |
|----------------------------------------------------------------------------------------------------------------------------------------|---------------------------------------------------------------------------------------------------------------------------------------------------------|
|                                                                                                                                        | <b>Section 2 How good is the quality of information regarding treatment choices?</b>                                                                    |
| <input type="checkbox"/> 1 <input type="checkbox"/> 2 <input type="checkbox"/> 3 <input type="checkbox"/> 4 <input type="checkbox"/> 5 | 9. Does it describe how each treatment works?                                                                                                           |
| <input type="checkbox"/> 1 <input type="checkbox"/> 2 <input type="checkbox"/> 3 <input type="checkbox"/> 4 <input type="checkbox"/> 5 | 10. Does it describe the benefits of each treatment?                                                                                                    |
| <input type="checkbox"/> 1 <input type="checkbox"/> 2 <input type="checkbox"/> 3 <input type="checkbox"/> 4 <input type="checkbox"/> 5 | 11. Does it describe the risks of each treatment?                                                                                                       |
| <input type="checkbox"/> 1 <input type="checkbox"/> 2 <input type="checkbox"/> 3 <input type="checkbox"/> 4 <input type="checkbox"/> 5 | 12. Does it describe what would happen if no treatment is used?                                                                                         |
| <input type="checkbox"/> 1 <input type="checkbox"/> 2 <input type="checkbox"/> 3 <input type="checkbox"/> 4 <input type="checkbox"/> 5 | 13. Does it describe how the treatment choices affect overall quality of life?                                                                          |
| <input type="checkbox"/> 1 <input type="checkbox"/> 2 <input type="checkbox"/> 3 <input type="checkbox"/> 4 <input type="checkbox"/> 5 | 14. Is it clear that there may be more than 1 possible treatment choice?                                                                                |
| <input type="checkbox"/> 1 <input type="checkbox"/> 2 <input type="checkbox"/> 3 <input type="checkbox"/> 4 <input type="checkbox"/> 5 | 15. Does it provide support for shared decision making?                                                                                                 |
| <b>Section 2 scores:</b> _____                                                                                                         |                                                                                                                                                         |
|                                                                                                                                        | <b>Section 3 Overall rating of the publication</b>                                                                                                      |
| <input type="checkbox"/> 1 <input type="checkbox"/> 2 <input type="checkbox"/> 3 <input type="checkbox"/> 4 <input type="checkbox"/> 5 | 16. Based on the answers to all of the above questions, rate the overall quality of the publication as a source of information about treatment choices: |
|                                                                                                                                        | Low (1-2): Serious or extensive shortcomings                                                                                                            |
|                                                                                                                                        | Moderate (3-4): Potentially important but not serious shortcomings                                                                                      |
|                                                                                                                                        | High (5): Minimal shortcomings                                                                                                                          |
| <b>Section 3 scores:</b> _____                                                                                                         |                                                                                                                                                         |
| <b>DISCERN total scores:</b>                                                                                                           |                                                                                                                                                         |
